# Supplementary material for: High speciation in the cryptic Pristimantis celator clade (Anura: Strabomantidae) of the Mira river basin, Ecuador-Colombia
Source: PeerJ journal article supplement (doi:10.7717/peerj.18680), 2025-01-29
Supplement: TableS2.pdf [file TableS2.pdf]

|                                        | <i>Pristimantis</i><br><i>sp 1</i> | <i>Pristimantis</i><br><i>macarthur</i><br><i>sp. nov.</i> | <i>Pristimantis</i><br><i>broaddus sp.</i><br><i>nov.</i> | <i>Pristimantis</i><br><i>satheri sp.</i><br><i>nov.</i> | <i>Pristimantis</i><br><i>sp 2</i> | <i>Pristimantis</i><br><i>celator</i> | <i>Pristimantis</i><br><i>mutabilis</i> | <i>Pristimantis</i><br><i>sp 3</i> | <i>Pristimantis</i><br><i>sp 4</i> | <i>Pristimantis</i><br><i>sp 5</i> | <i>Pristimantis</i><br><i>sp 6</i> | <i>Pristimantis</i><br><i>sp 7</i> | <i>Pristimantis robayoi</i><br><i>sp. nov.</i> |
|----------------------------------------|------------------------------------|------------------------------------------------------------|-----------------------------------------------------------|----------------------------------------------------------|------------------------------------|---------------------------------------|-----------------------------------------|------------------------------------|------------------------------------|------------------------------------|------------------------------------|------------------------------------|------------------------------------------------|
| <i>Pristimantis sp 1</i>               |                                    |                                                            |                                                           |                                                          |                                    |                                       |                                         |                                    |                                    |                                    |                                    |                                    |                                                |
| <i>Pristimantis macarthur sp. nov.</i> | 6.33%                              |                                                            |                                                           |                                                          |                                    |                                       |                                         |                                    |                                    |                                    |                                    |                                    |                                                |
| <i>Pristimantis broaddus sp. nov.</i>  | 7.19%                              | 3.54%                                                      |                                                           |                                                          |                                    |                                       |                                         |                                    |                                    |                                    |                                    |                                    |                                                |
| <i>Pristimantis satheri sp. nov.</i>   | 11.17%                             | 10.01%                                                     | 11.00%                                                    |                                                          |                                    |                                       |                                         |                                    |                                    |                                    |                                    |                                    |                                                |
| <i>Pristimantis sp 2</i>               | 12.50%                             | 12.38%                                                     | 12.54%                                                    | 11.14%                                                   |                                    |                                       |                                         |                                    |                                    |                                    |                                    |                                    |                                                |
| <i>Pristimantis celator</i>            | 12.14%                             | 11.46%                                                     | 12.47%                                                    | 12.11%                                                   | 14.20%                             |                                       |                                         |                                    |                                    |                                    |                                    |                                    |                                                |
| <i>Pristimantis mutabilis</i>          | 12.46%                             | 11.67%                                                     | 12.28%                                                    | 11.14%                                                   | 15.12%                             | 11.06%                                |                                         |                                    |                                    |                                    |                                    |                                    |                                                |
| <i>Pristimantis sp 3</i>               | 11.71%                             | 12.28%                                                     | 12.74%                                                    | 13.04%                                                   | 15.04%                             | 10.83%                                | 10.05%                                  |                                    |                                    |                                    |                                    |                                    |                                                |
| <i>Pristimantis sp 4</i>               | 12.50%                             | 12.49%                                                     | 12.81%                                                    | 12.99%                                                   | 14.97%                             | 10.49%                                | 9.56%                                   | 6.12%                              |                                    |                                    |                                    |                                    |                                                |
| <i>Pristimantis sp 5</i>               | 15.06%                             | 12.40%                                                     | 13.77%                                                    | 14.05%                                                   | 15.63%                             | 11.63%                                | 9.87%                                   | 6.70%                              | 5.36%                              |                                    |                                    |                                    |                                                |
| <i>Pristimantis sp 6</i>               | 12.16%                             | 12.08%                                                     | 12.74%                                                    | 13.26%                                                   | 14.79%                             | 10.79%                                | 10.89%                                  | 4.84%                              | 5.83%                              | 8.53%                              |                                    |                                    |                                                |
| <i>Pristimantis sp 7</i>               | 11.44%                             | 11.60%                                                     | 12.17%                                                    | 12.80%                                                   | 15.23%                             | 9.81%                                 | 9.65%                                   | 4.18%                              | 5.24%                              | 5.58%                              | 3.09%                              |                                    |                                                |
| <i>Pristimantis robayoi sp. nov.</i>   | 13.21%                             | 11.61%                                                     | 11.87%                                                    | 12.59%                                                   | 14.00%                             | 11.20%                                | 11.00%                                  | 9.28%                              | 8.79%                              | 9.61%                              | 8.08%                              | 7.79%                              |                                                |
| <i>Pristimantis verecundus</i>         | 11.72%                             | 10.97%                                                     | 11.42%                                                    | 12.58%                                                   | 14.79%                             | 9.56%                                 | 10.14%                                  | 9.30%                              | 9.31%                              | 9.59%                              | 9.48%                              | 8.08%                              | 8.81%                                          |

S2. Estimates of Evolutionary Divergence over Sequence Pairs between Groups. The number of base differences per site from averaging over all sequence pairs between groups are shown. This analysis involved 60 nucleotide sequences. All ambiguous positions were removed for each sequence pair (pairwise deletion option). There were a total of 1538 positions in the final dataset. Evolutionary analyses were conducted in MEGA11
